# Supplementary material
Source: Springer Nature journal article supplement (https://www.springermedizin.de/resource/supplementary/12889_2011_3392_MOESM2_ESM.pdf/9488956)

P  
e  
r  
c  
e  
n  
t  
a  
g  
e  
\*

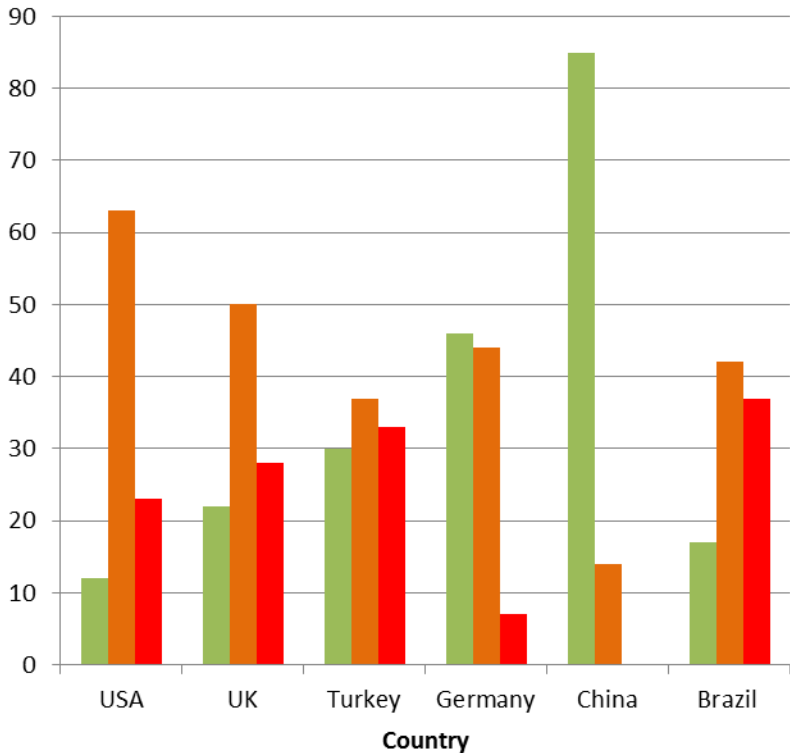

**Severity**

- MRC (Mild)
- MRC (Moderate)
- MRC (Severe)

Supplement: MOESM2 [file 9488956]
